# Supplementary material for: A new type of solid-state luminescent 2-phenylbenzo[g]furo[2,3-b]quinoxaline derivative: synthesis, photophysical characterization and transporting properties
Source: Royal Society of Chemistry journal article supplement (doi:10.1039/c9tc02539a), 2019-01-01
Supplement: c9tc02539a1.pdf [file c9tc02539a1.pdf]

## **A new type of solid-state luminescent 2-phenylbenzo[g]furo**

### **[2,3-B]quinoxaline derivatives: synthesis, photophysical**

### **characterization and transporting properties**

Gang Wang, Jie Li, Yixiang Li, Dongdong Wang\*, jingjing Zhang, Yong Wu, Yonggang Zhen\*, Qingxin Tang, Hong Ma\*, Wenping Hu, Zhaoxin Wu, and Alex K.-Y. Jen

#### **Electronic Supplementary Information**

##### **Contents**

|                                                                                 |             |
|---------------------------------------------------------------------------------|-------------|
| <b>Section 1: Computational details and Results of theoretical calculations</b> | <b>S1</b>   |
| <b>Section 2: Supplementary Tables S1-2</b>                                     | <b>S1</b>   |
| <b>Section 3: Supplementary Figures S1-5</b>                                    | <b>S2-3</b> |
| <b>Section 4: <sup>1</sup>H NMR and <sup>13</sup>C NMR spectra</b>              | <b>S4-6</b> |

## Section 1: Computational details and Results of theoretical calculations

Singlet ground state ( $S_0$ ) geometries of 3a were fully optimized by using M06 method of density functional theory (DFT). The standard 6-311G(d,p) basis set on non-metal atoms and the relativistic effective core potential (ECP) LANL2DZ on Ir atom were taken in our calculations. The solvent effects were evaluated with the self-consistent reaction field (SCRF) based on the integral equation formalism of the polarizable continuum model (IEFPCM) in  $\text{CH}_2\text{Cl}_2$  solvent ( $\epsilon=8.93$ ). The vertical excitation calculations in  $\text{CH}_2\text{Cl}_2$  for the simulation of absorption spectra were used by the time-dependent (TD) DFT method. To gain the features of emission processes of the 3a compounds, the first triplet state ( $T_1$ ) geometries were located by the M05-2x functional combined with the same basis set as mentioned above. The suitability of M05-2x functional for the emission spectra of a series of iridium compounds has been well-documented.<sup>S1, S2</sup> Based on  $T_1$  optimized structures, the single-point energy calculations were conducted at their  $S_0$  states. In this way, the positions of the first phosphorescence bands of all iridium compounds were estimated by the  $S_0$ - $T_1$  gap of electronic energies including solvent effects. All calculations were carried out with the Gaussian 09 program package.<sup>S3</sup>

## Section 2: Supplementary Tables

**Table S1.** The photophysical data for 5a in different states, including maximum emission wavelength (nm), fluorescence quantum yields  $\Phi_F$ , fluorescence lifetimes  $\tau_F$ , and rate constants for radiative  $k_r$ , calculated via  $\Phi_F = k_r \cdot \tau_F$ .

| system      |                                   | $\lambda_{\text{em}}/\text{nm}$ | $\Phi_F/\%$ | $\tau_F/\text{ns}$ | $k_r/\text{ns}^{-1}$ |
|-------------|-----------------------------------|---------------------------------|-------------|--------------------|----------------------|
| solution    | $\text{CH}_2\text{Cl}_2$          | 515                             | 9.19        | 3.58               | 0.026                |
|             | THF                               | 512                             | 9.79        | 3.06               | 0.032                |
|             | doped in PS film(1%)              | 505                             | 9.28        | 2.78               | 0.033                |
|             | powders                           | 597                             | 22.14       | 11.39              | 0.019                |
| Solid state | NPs in THF:H <sub>2</sub> O (1:1) | 545                             | 19.73       | 10.37              | 0.019                |

**Table S2** The semiconductor character data of 3a, 3b deposited on different substrate.

| Substrate |                | $\mu(\text{cm}^2 \cdot \text{V}^{-1} \cdot \text{s}^{-1})$ | $V_T(\text{V})$ | $I_{\text{on}}/I_{\text{off}}$ |
|-----------|----------------|------------------------------------------------------------|-----------------|--------------------------------|
| 3a        | OTS            | $5.7 \times 10^{-3}$                                       | -26             | $1.4 \times 10^5$              |
|           | $\text{SiO}_2$ | $8.2 \times 10^{-5}$                                       | -33             | $1.5 \times 10^3$              |
| 3b        | OTS            | $1.1 \times 10^{-4}$                                       | -34             | $2.0 \times 10^3$              |
|           | $\text{SiO}_2$ | $3.6 \times 10^{-5}$                                       | -44             | $2.5 \times 10^2$              |
| 5c        | OTS            | no mobility                                                | --              | --                             |

### Section 3: Supplementary Figures S1-6

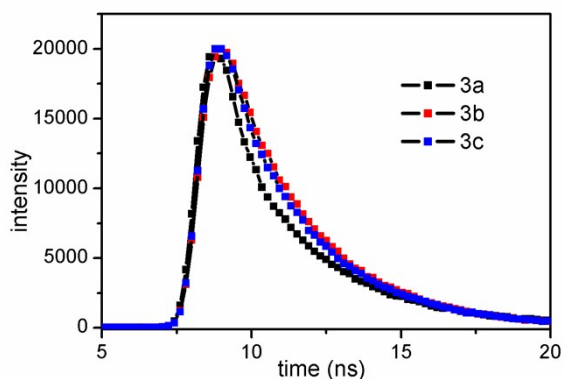

**Fig. S1** The fluorescence decay of 3a-3c in CH<sub>2</sub>Cl<sub>2</sub> solution.

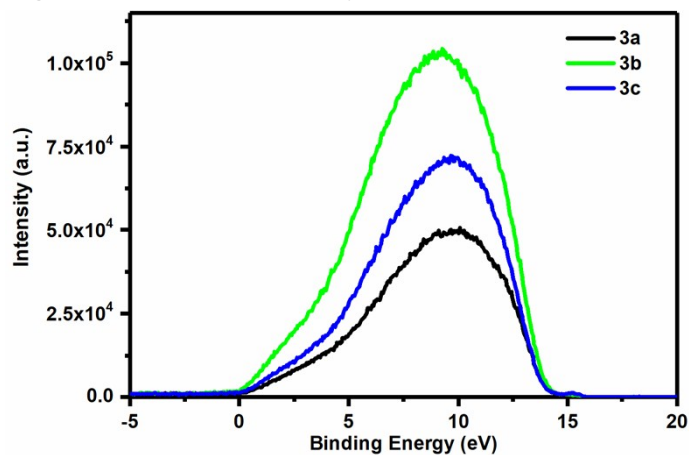

**Fig. S2** UPS energy distribution curves of 3a-3c.

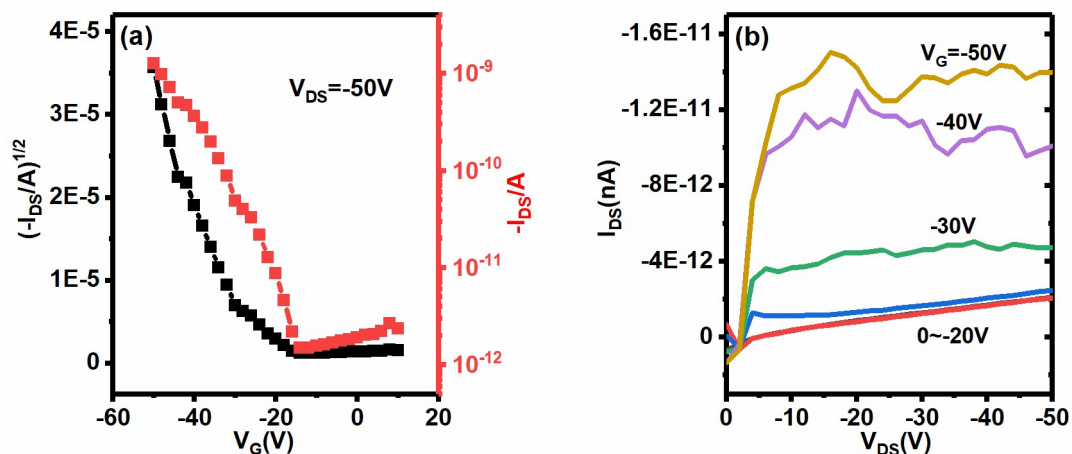

**Fig. S3** (a) Transfer and (b) output curves of the field-effect transistors with 5b thin film deposited on OTS/SiO<sub>2</sub>/Si

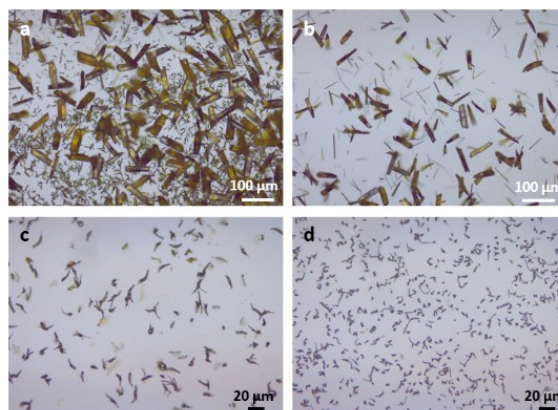

**Fig. S4** Optical micrographs of 3a crystals with PVD technology in different zone

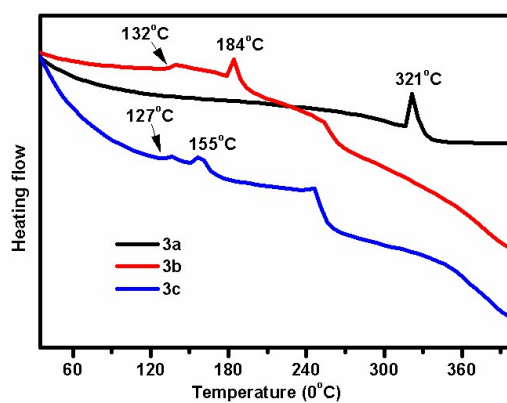

**Fig. S5** DSC curves of 3a-3c with the melting temperature and glass transition temperature indicated by arrows

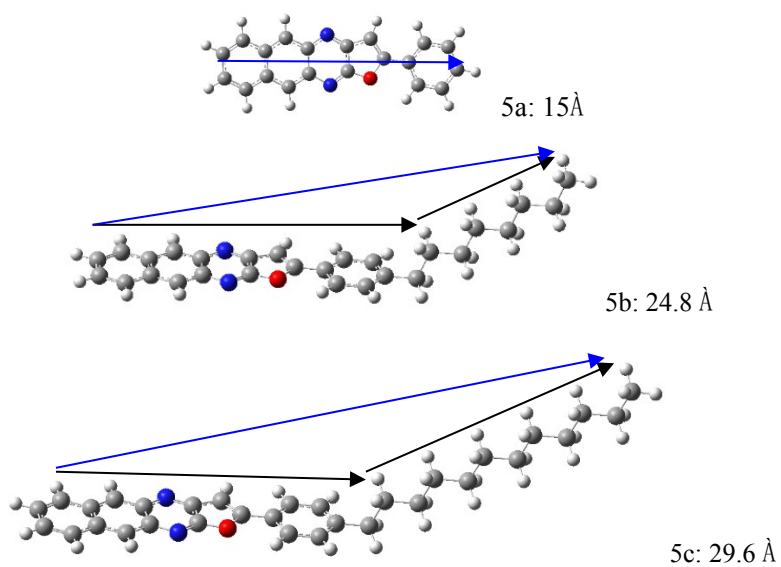

**Fig. S6** The calculated molecular length (blue line) of 5a-5c

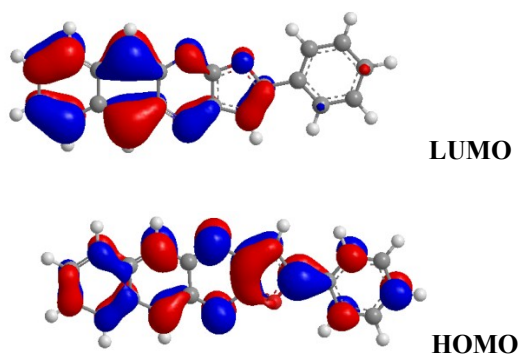

twist angle: 0°

**Fig. S7** The calculated contours of the HOMOs and LUMOs orbitals of 3a with twist angle of 0° between the phenyl face and benzo [g] furo [2,3-B] quinoxaline

## Section 4: $^1\text{H}$ NMR and $^{13}\text{C}$ NMR spectra.

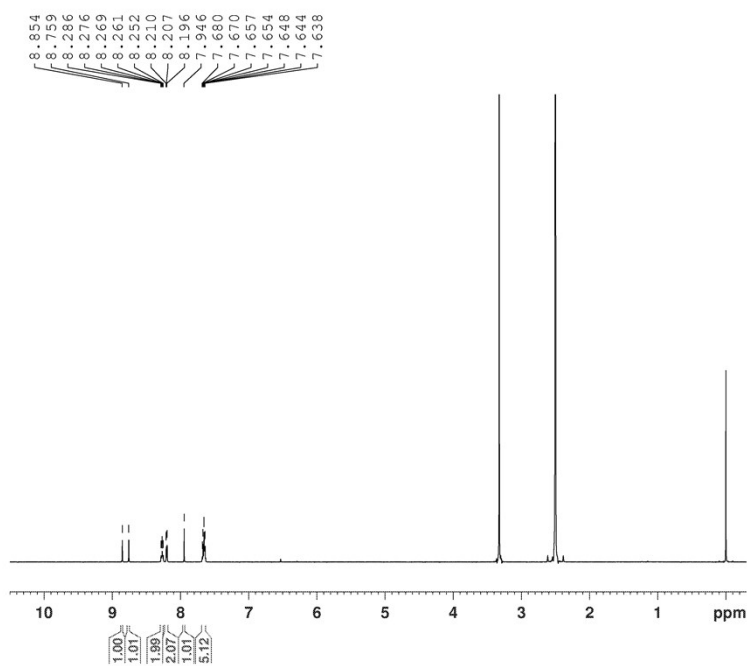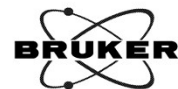

```

NAME      Jun26-2019-lyx-c0
EXPNO     10
PROCNO    1
Date_     20190626
Time      22.46 h
INSTRUM   spect
PROBHD    Z150357_0010 (
PULPROG   zg30
TD         65536
SOLVENT   DMSO
NS         16
DS         2
SWH        12019.230 Hz
FIDRES     0.366798 Hz
AQ         2.7263477 sec
RG         11.16
DW         41.600 usec
DE         10.00 usec
TE         298.1 K
D1         1.00000000 sec
TDO        1
SFO1       600.2037062 MHz
NUC1       1H
P1         12.00 usec
SI         65536
SF         600.2000035 MHz
WDW        EM
SSB        0
LB         0.30 Hz
GB         0
PC         1.00
    
```

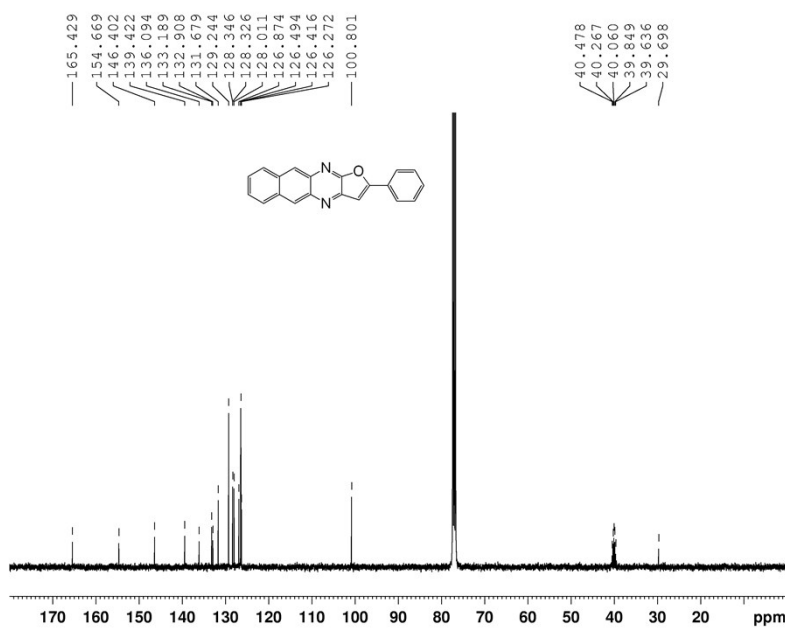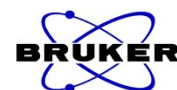

```

NAME      wdd-20180613-C0-C
EXPNO     2
PROCNO    1
Date_     20180614
Time      7.55
INSTRUM   spect
PROBHD    5 mm PABBO BB-
PULPROG   zgpg30
TD         65536
SOLVENT   CDCl3
NS         10240
DS         4
SWH        24038.461 Hz
FIDRES     0.366798 Hz
AQ         1.3631988 se
RG         203
DW         20.800 us
DE         6.50 us
TE         297.8 K
D1         2.00000000 se
D11        0.03000000 se
TDO        1

===== CHANNEL f1 =====
NUC1       13C
P1         8.90 us
PL1        -3.00 dB
PL1W       66.6579058 W
SFO1       100.6228298 MH

===== CHANNEL f2 =====
CPDPRG2    waltz16
NUC2       1H
PCPD2      80.00 us
PL2        -3.00 dB
PL12       12.20 dB
PL13       13.00 dB
PL2W       17.09048462 W
PL12W      0.51612443 W
PL13W      0.42929357 W
SFO2       400.1316005 MH
SI         32768
SF         100.6127690 MH
WDW        EM
SSB        0
LB         1.00 Hz
GB         0
PC         1.40
    
```

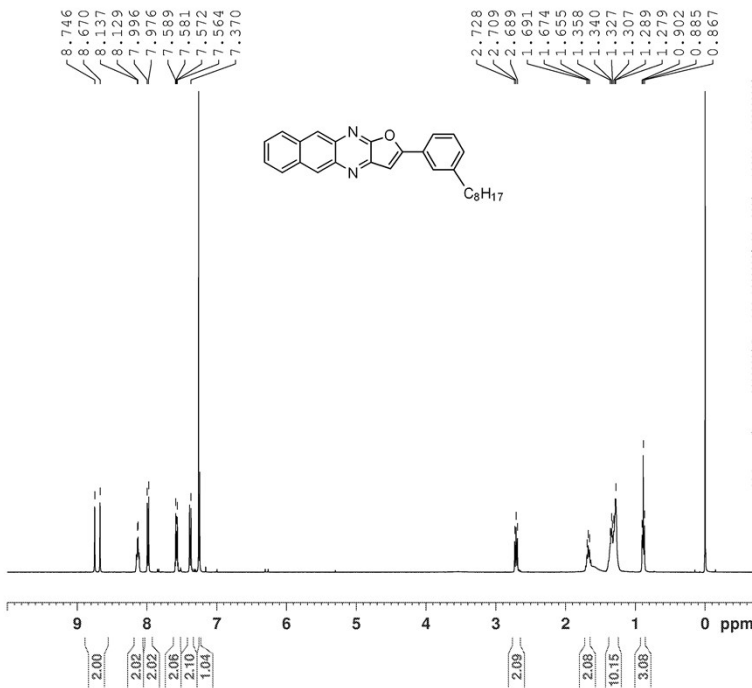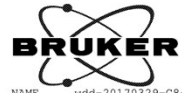

NAME wdd-20170329-C8-HPU  
 EXPNO 6  
 PROCNO 1  
 Date\_ 20170329  
 Time 17.34  
 INSTRUM spect  
 PROBHD 5 mm PABBO BB-  
 PULPROG zg30  
 TD 65536  
 SOLVENT CDCl3  
 NS 72  
 DS 2  
 SWH 8223.685 Hz  
 FIDRES 0.125483 Hz  
 AQ 3.9846387 sec  
 RG 203  
 DW 60.800 usec  
 DE 6.50 usec  
 TE 294.2 K  
 D1 1.00000000 sec  
 TDO 1

===== CHANNEL f1 =====  
 NUC1 1H  
 P1 13.90 usec  
 PL1 -3.00 dB  
 PL1W 17.09048462 W  
 SFO1 400.1324710 MHz  
 SI 32768  
 SF 400.1300101 MHz  
 WDW EM  
 SSB 0  
 LB 0.30 Hz  
 GB 0  
 PC 1.00

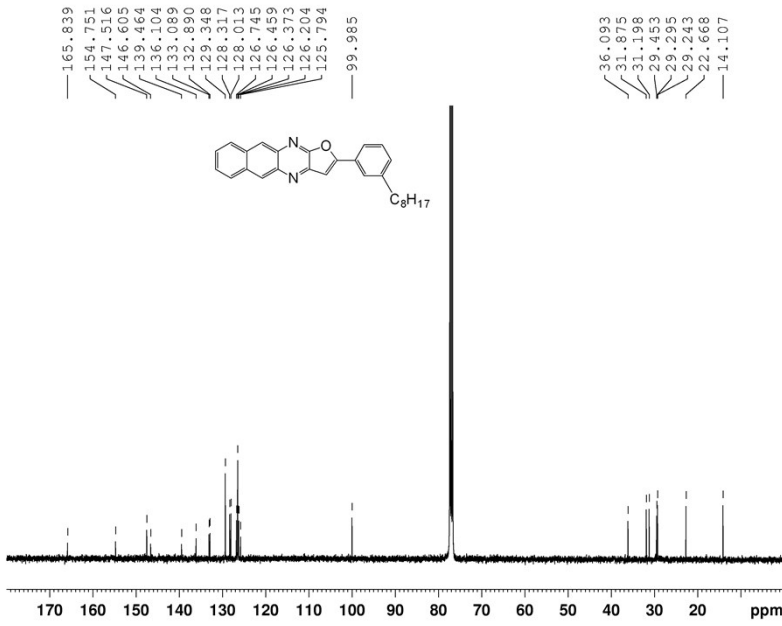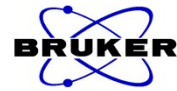

NAME wdd-20180614-C8-C  
 EXPNO 2  
 PROCNO 1  
 Date\_ 20180615  
 Time 8.03  
 INSTRUM spect  
 PROBHD 5 mm PABBO BB-  
 PULPROG zgpg30  
 TD 65536  
 SOLVENT CDCl3  
 NS 10240  
 DS 4  
 SWH 24038.461 Hz  
 FIDRES 0.366798 Hz  
 AQ 1.3631988 se  
 RG 203  
 DW 20.800 us  
 DE 6.50 us  
 TE 298.1 K  
 D1 2.00000000 se  
 D11 0.03000000 se  
 TDO 1

===== CHANNEL f1 =====  
 NUC1 13C  
 P1 8.90 us  
 PL1 -3.00 dB  
 PL1W 66.65790588 W  
 SFO1 100.6228298 MH  
 ===== CHANNEL f2 =====  
 CPDPRG2 waltz16  
 NUC2 1H  
 PCPD2 80.00 us  
 PL2 -3.00 dB  
 PL12 12.20 dB  
 PL13 13.00 dB  
 PL2W 17.09048462 W  
 PL12W 0.51612443 W  
 PL13W 0.42939357 W  
 SFO2 400.1316005 MH  
 SI 32768  
 SF 100.6127690 MH  
 WDW EM  
 SSB 0  
 LB 1.00 Hz  
 GB 0  
 PC 1.40

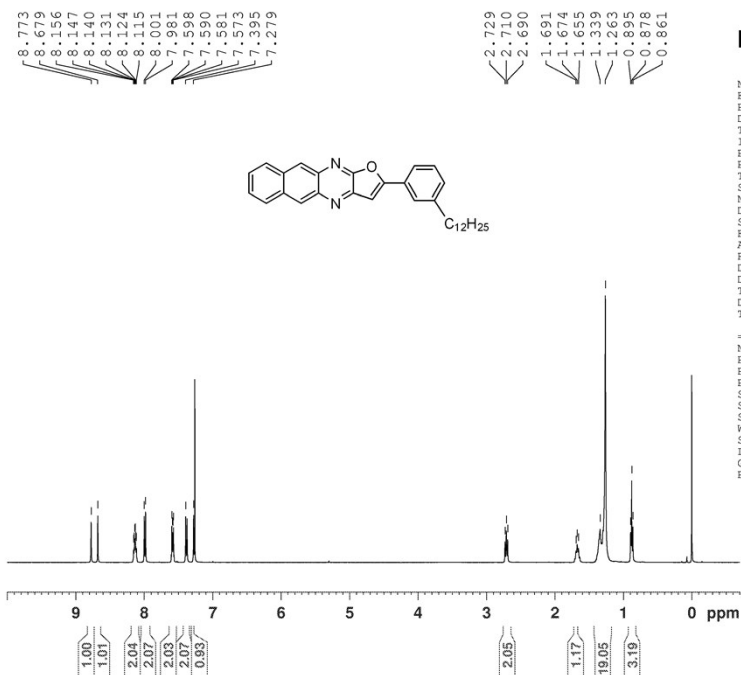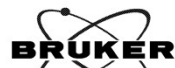

```

NAME wdd-20170329-C12
EXPNO 6
PROCNO 1
Date_ 20170329
Time 16.18
INSTRUM spect
PROBHD 5 mm PABBO BB-
PULPROG zg30
TD 65536
SOLVENT CDCl3
NS 64
DS 2
SWH 8223.685 Hz
FIDRES 0.125483 Hz
AQ 3.9846387 sec
RG 203
DW 60.800 usec
DE 6.50 usec
TE 294.1 K
D1 1.0000000 sec
TD0 1

===== CHANNEL f1 =====
NUC1 1H
P1 13.90 usec
PL1 -3.00 dB
PL1W 17.09048462 W
SFO1 400.1324710 MHz
SI 32768
SF 400.1300092 MHz
WDW EM
SSB 0
LB 0.30 Hz
GB 0
PC 1.00
  
```

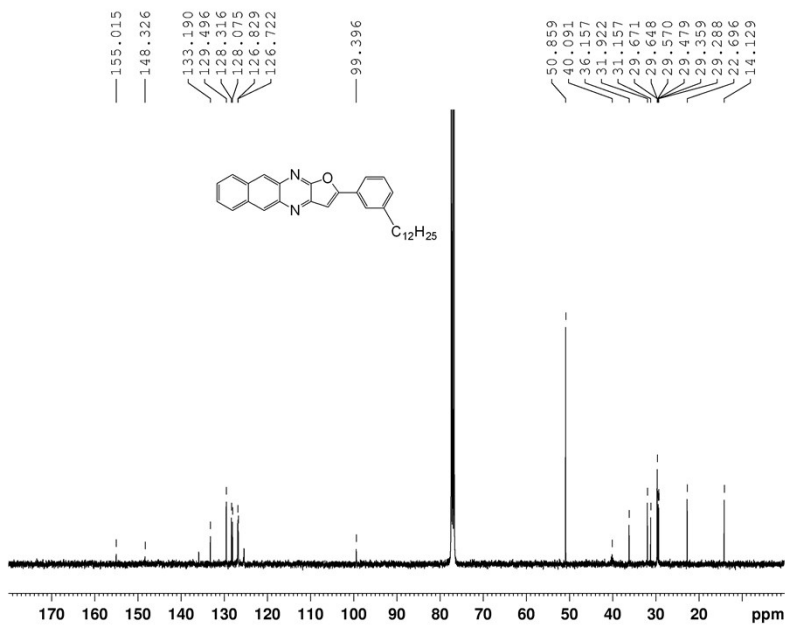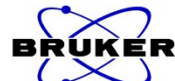

```

NAME wdd-20171219-C12-
EXPNO 1
PROCNO 1
Date_ 20171220
Time 9.26
INSTRUM spect
PROBHD 5 mm PABBO BB-
PULPROG zgpg30
TD 65536
SOLVENT CDCl3
NS 10240
DS 4
SWH 24038.461 Hz
FIDRES 0.366798 Hz
AQ 1.3631988 se
RG 203
DW 20.800 us
DE 6.50 us
TE 2961.0 K
D1 2.0000000 se
D11 0.0300000 se
TD0 1

===== CHANNEL f1 =====
NUC1 13C
P1 9.90 us
PL1 -3.00 dB
PL1W 66.65790558 W
SFO1 100.6228298 MH

===== CHANNEL f2 =====
CPDPRG2 waltz16
NUC2 1H
PCPD2 80.00 us
PL2 -3.00 dB
PL12 12.20 dB
PL13 13.00 dB
PL2W 17.09048462 W
PL12W 0.51612443 W
PL13W 0.42929357 W
SFO2 400.1316005 MH
SI 32768
SF 100.6127690 MH
WDW EM
SSB 0
LB 1.00 Hz
GB 0
PC 1.40
  
```



## REFERENCE

- (S1) K. Swiderek, P. Paneth, *J. Phys. Org. Chem.*, 2009, **22**, 845.
- (S2) E. Baranoff, B. F. E. Curchod, F. Monti, et al. *Inorg. Chem.* 2012, **51**, 799.
- (S3) Gaussian 09, Revision **B.02**, M. J. Frisch, G. W. Trucks, H. B. Schlegel, G. E. Scuseria, M. A. Robb, J. R. Cheeseman, G. Scalmani, V. Barone, B. Mennucci, G. A. Petersson, H. Nakatsuji, M. Caricato, X. Li, H. P. Hratchian, A. F. Izmaylov, J. Bloino, G. Zheng, J. L. Sonnenberg, M. Hada, M. Ehara, K. Toyota, R. Fukuda, J. Hasegawa, M. Ishida, T. Nakajima, Y. Honda, O. Kitao, H. Nakai, T. Vreven, J. A. Montgomery, Jr., J. E. Peralta, F. Ogliaro, M. Bearpark, J. J. Heyd, E. Brothers, K. N. Kudin, V. N. Staroverov, R. Kobayashi, J. Normand, K. Raghavachari, A. Rendell, J. C. Burant, S. S. Iyengar, J. Tomasi, M. Cossi, N. Rega, J. M. Millam, M. Klene, J. E. Knox, J. B. Cross, V. Bakken, C. Adamo, J. Jaramillo, R. Gomperts, R. E. Stratmann, O. Yazyev, A. J. Austin, R. Cammi, C. Pomelli, J. W. Ochterski, R. L. Martin, K. Morokuma, V. G. Zakrzewski, G. A. Voth, P. Salvador, J. J. Dannenberg, S. Dapprich, A. D. Daniels, Ö. Farkas, J. B. Foresman, J. V. Ortiz, J. Cioslowski, and D. J. Fox, Gaussian, Inc., Wallingford CT, 2009.
